# Supplementary material
Source: publisher site journal article supplement (https://www.dovepress.com/article/359156)
Supplement: Supplementary file 1 [file get_supplementary_file.php]

**Combined Prussian blue nanozyme carriers improve photodynamic therapy and effective interruption of tumor metastasis**

Wenhao Shen1,**#**, Gaohua Han1,**#**, Lei Yu1, Song Yang1, Xiangyi Li2, Wei Zhang3,*****, Pei Pei4,*****

1Department of Oncology, Hospital Affiliated 5 to Nantong University (Taizhou People's Hospital), Taizhou, Jiangsu, China;

2Department of endocrinology, Hospital Affiliated 5 to Nantong University (Taizhou People's Hospital), Taizhou, Jiangsu, China;

3Department of Infectious Disease, Hospital Affiliated 5 to Nantong University (Taizhou People's Hospital), Taizhou, Jiangsu, China;

4 School of Basic Medical Sciences, Anhui Medical University, Hefei 230032, P. R. China.

**#**These authors contributed equally to this manuscript.

*****Corresponding authors: Wei Zhang: zw562652291@126.com; Pei Pei: ppei1204@outlook.com.

**
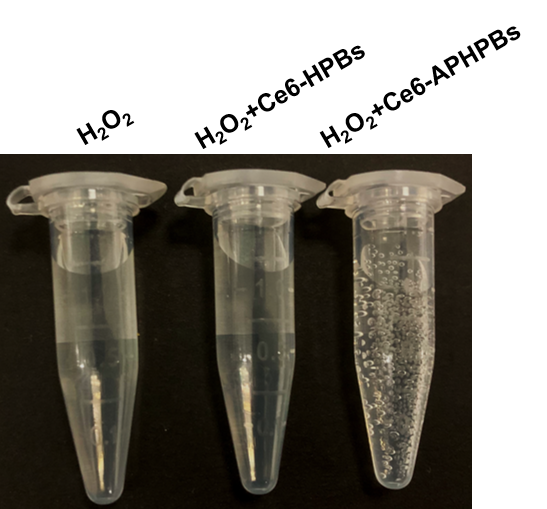
**

**Figure S1** Photos of Ce6-APHBPs catalyzing H2O2 decomposition to produce O2.


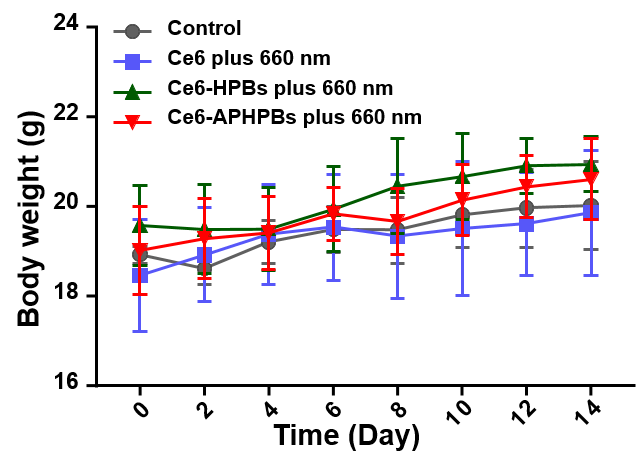


**Figure S2** Body weight of 4T1 tumor bearing mice at different time points after treatments.
